# Supplementary material for: Efficient CO2 capture by deep eutectic solvents through reducing the reaction between carbenes and CO2
Source: Royal Society of Chemistry journal article supplement (doi:10.1039/d4nj05090h), 2025-01-01
Supplement: d4nj05090h1.pdf [file d4nj05090h1.pdf]

## Supporting information

# Efficient CO<sub>2</sub> capture by deep eutectic solvents through reducing the reaction between carbenes and CO<sub>2</sub>

Jiaxun Zhu <sup>a</sup>, Bohao Lu,<sup>b</sup> and Dezhong Yang <sup>b,\*</sup>

<sup>a</sup>*School of Materials Science and Technology, China University of Geosciences, No. 29 Xueyuan Road, Beijing 100083, China*

<sup>b</sup>*School of Science, China University of Geosciences, No. 29 Xueyuan Road, Beijing 100083, China*

Corresponding author: Dezhong Yang, Email: yangdz@cugb.edu.cn

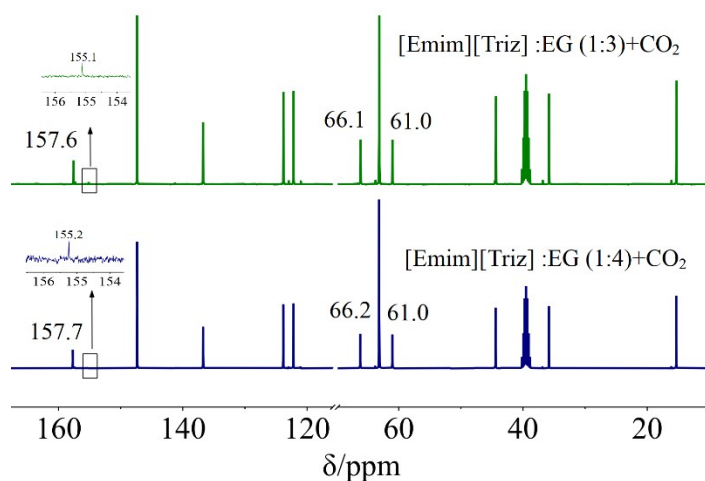

**Fig. S1**  $^{13}\text{C}$  NMR spectra of [Emim][Triz]:EG (1:3) and (1:4) after  $\text{CO}_2$  uptake.

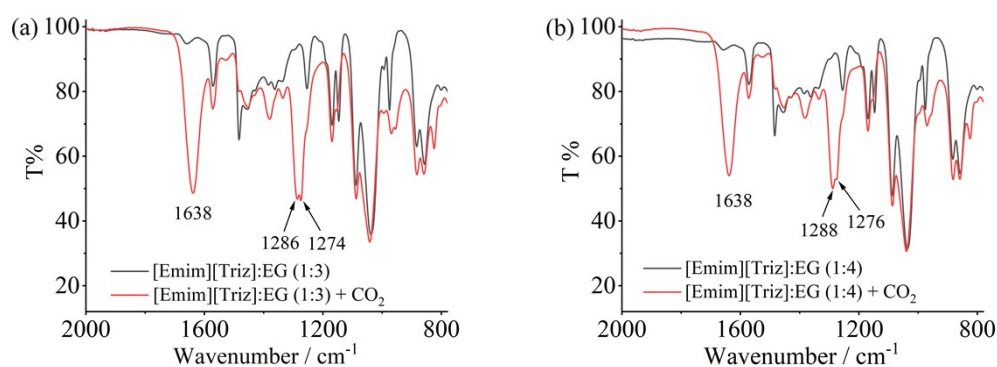

**Fig. S2** FTIR spectra of [Emim][Triz]:EG (1:3) (a) and (1:4) (b) with and without  $\text{CO}_2$ .

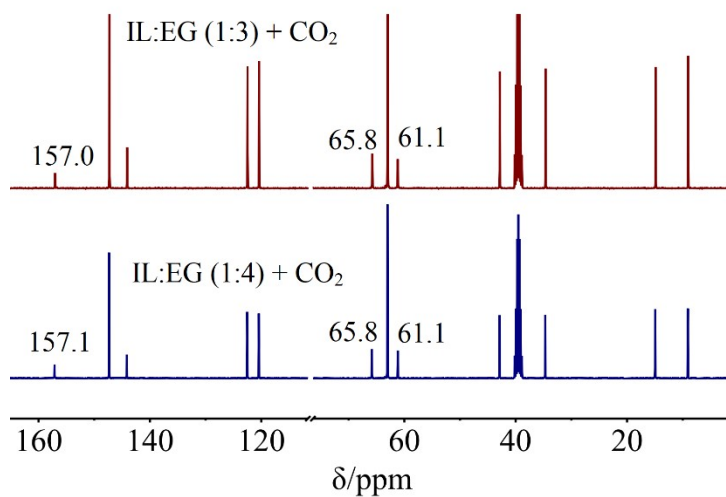

**Fig. S3**  $^{13}\text{C}$  NMR spectra of [Emmim][Triz]:EG (1:3) and (1:4) after  $\text{CO}_2$  uptake.

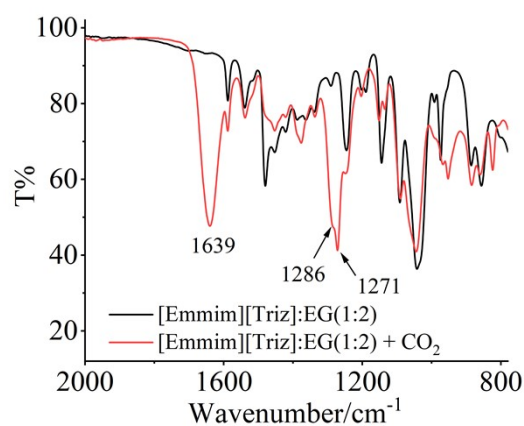

**Fig. S4** FTIR spectra of [Emmim][Triz]:EG (1:2) with and without CO<sub>2</sub>.

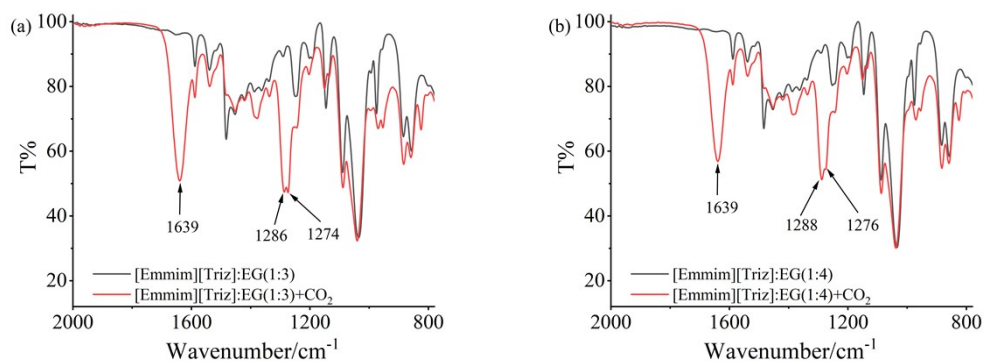

**Fig. S5** FTIR spectra of [Emmim][Triz]:EG (1:3) (a) and (1:4) (b) with and without CO<sub>2</sub>.

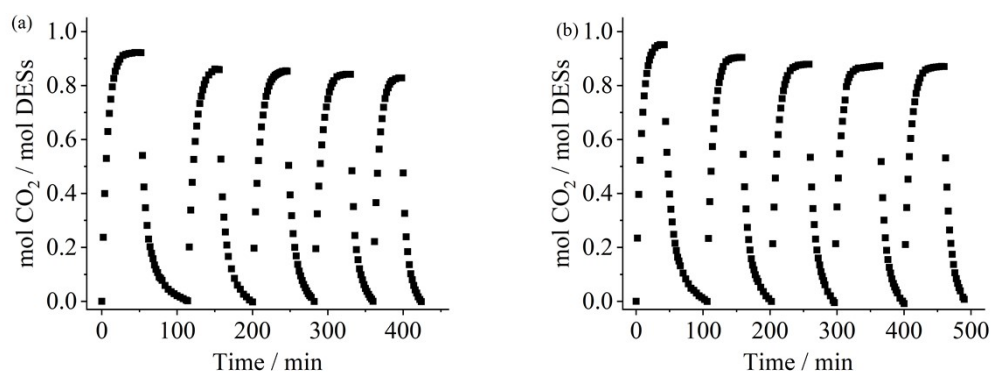

**Fig. S6** The absorption-desorption cycles by [Emim][Triz]:EG (1:2) (a) (capture: 25 °C; release: 70 °C) and [Emmim][Triz]:EG (1:2) (b) (capture: 25 °C; release: 60 °C).
